# Supplementary material for: The CfSnt2-Dependent Deacetylation of Histone H3 Mediates Autophagy and Pathogenicity of Colletotrichum fructicola
Source: MDPI journal article supplement (doi:10.3390/jof8090974), 2022-09-18
Supplement: s1 [file s1]

**Table S1. The expression levels of *CfATG* genes in transcriptome data**

| Gene ID            | Gene name      | $\Delta Cfgcn5/WT$ | P value  |
|--------------------|----------------|--------------------|----------|
| gene-CGGC5_v001583 | <i>CfATG1</i>  | 1.265              | 0.016    |
| gene-CGGC5_v006476 | <i>CfATG2</i>  | 1.532              | 9.47E-07 |
| gene-CGGC5_v011295 | <i>CfATG3</i>  | 2.480              | 1.09E-19 |
| gene-CGGC5_v013845 | <i>CfATG4</i>  | 1.794              | 3.84E-10 |
| gene-CGGC5_v006481 | <i>CfATG5</i>  | 1.325              | 0.037    |
| gene-CGGC5_v012401 | <i>CfATG6</i>  | 1.243              | 0.025    |
| gene-CGGC5_v015799 | <i>CfATG7</i>  | 2.115              | 1.72E-08 |
| gene-CGGC5_v010022 | <i>CfATG8</i>  | 2.908              | 4E-27    |
| gene-CGGC5_v013854 | <i>CfATG9</i>  | 1.378              | 0.001    |
| gene-CGGC5_v001121 | <i>CfATG10</i> | 1.937              | 8.07E-08 |
| gene-CGGC5_v014758 | <i>CfATG12</i> | 4.288              | 1.01E-24 |
| gene-CGGC5_v014851 | <i>CfATG13</i> | 4.284              | 1.94E-66 |
| gene-CGGC5_v007470 | <i>CfATG15</i> | 1.126              | 0.323    |
| gene-CGGC5_v001805 | <i>CfATG16</i> | 1.092              | 0.445    |
| gene-CGGC5_v008931 | <i>CfATG18</i> | 1.345              | 0.001    |

**Table S2 Primers used in this study**

| Primer name          | Sequence (5'-3')        | Remark                           |
|----------------------|-------------------------|----------------------------------|
| qRT1F                | TGATGGTATTTGCGAAGAGG    | qRT-PCR Primer of v012815        |
| qRT1R                | TGTAGGTTCCGACGAAGATTAG  | qRT-PCR Primer of v012815        |
| qRT2F                | ATCATCGTCGTCGCCATCC     | qRT-PCR Primer of v008601        |
| qRT2R                | GCTTGCCAGTCTTGAGGTTGT   | qRT-PCR Primer of v008601        |
| qRT3F                | AGAAGGCGTGGAACCTCGTA    | qRT-PCR Primer of v004552        |
| qRT3R                | CGTGTTTGGTAGAGGGGAG     | qRT-PCR Primer of v004552        |
| qRT4F                | CCGCTCTACAACGCCACTAA    | qRT-PCR Primer of v001103        |
| qRT4R                | AACTTGCCCGTCGCCATAC     | qRT-PCR Primer of v001103        |
| qRT5F                | TTTGGCAGGTCAGGTTGGG     | qRT-PCR Primer of v004561        |
| qRT5R                | GCTGGATGGGGAGCGGTAT     | qRT-PCR Primer of v004561        |
| qRT6F                | TGGTCCAAGACGGCATTGAG    | qRT-PCR Primer of v014933        |
| qRT6R                | GGTGGGAGCGACGAAGAGA     | qRT-PCR Primer of v014933        |
| qRTC <i>fATG1</i> F  | AAACTGGGGACGGACTTGG     | qRT-PCR Primer of <i>CfATG1</i>  |
| qRTC <i>fATG1</i> R  | ATCCTGAGCCGCCTTTTCT     | qRT-PCR Primer of <i>CfATG1</i>  |
| qRTC <i>fATG2</i> F  | CAAGAACTCCCTCGAAACAACA  | qRT-PCR Primer of <i>CfATG2</i>  |
| qRTC <i>fATG2</i> R  | GCTCAATCCGCCAAACCAG     | qRT-PCR Primer of <i>CfATG2</i>  |
| qRTC <i>fATG3</i> F  | GAGGATTTCCCCTTCTTCGC    | qRT-PCR Primer of <i>CfATG3</i>  |
| qRTC <i>fATG3</i> R  | CTGGTCGTCAACCTCGCTTT    | qRT-PCR Primer of <i>CfATG3</i>  |
| qRTC <i>fATG4</i> F  | TGGGTCGGTCATACAATCT     | qRT-PCR Primer of <i>CfATG4</i>  |
| qRTC <i>fATG4</i> R  | TCCATCTTGAACAGCGTAATC   | qRT-PCR Primer of <i>CfATG4</i>  |
| qRTC <i>fATG5</i> F  | CCCGACGCTGTTCCCATCCA    | qRT-PCR Primer of <i>CfATG5</i>  |
| qRTC <i>fATG5</i> R  | CGACCGTGACACAGAGCCAACC  | qRT-PCR Primer of <i>CfATG5</i>  |
| qRTC <i>fATG6</i> F  | CACTCCTCACGAATCCCACA    | qRT-PCR Primer of <i>CfATG6</i>  |
| qRTC <i>fATG6</i> R  | CCTTTTGAACCAGCCTTGC     | qRT-PCR Primer of <i>CfATG6</i>  |
| qRTC <i>fATG7</i> F  | TCGGCTTGGTTCCTCACAC     | qRT-PCR Primer of <i>CfATG7</i>  |
| qRTC <i>fATG7</i> R  | CAGCACCTCCTCTTCATCTT    | qRT-PCR Primer of <i>CfATG7</i>  |
| qRTC <i>fATG8</i> F  | CCGATCTCCCATCATCCCG     | qRT-PCR Primer of <i>CfATG8</i>  |
| qRTC <i>fATG8</i> R  | TGCTCCTCGTAGATGCTGCTC   | qRT-PCR Primer of <i>CfATG8</i>  |
| qRTC <i>fATG9</i> F  | ATTTTGGTCTTTGGCTGTATGT  | qRT-PCR Primer of <i>CfATG9</i>  |
| qRTC <i>fATG9</i> R  | CTCTTTGGATTGGTTCCGTAT   | qRT-PCR Primer of <i>CfATG9</i>  |
| qRTC <i>fATG10</i> F | TGCCACCACTTTGACAGCC     | qRT-PCR Primer of <i>CfATG10</i> |
| qRTC <i>fATG10</i> R | TTCAGCATCTATCATAGCCTCGT | qRT-PCR Primer of <i>CfATG10</i> |

|                      |                        |                                  |
|----------------------|------------------------|----------------------------------|
| qRT <i>CfATG12</i> F | TAAGTTCAAGCCCGTGGG     | qRT-PCR Primer of <i>CfATG12</i> |
| qRT <i>CfATG12</i> R | GCCAAAGGCTGGGTTCATAG   | qRT-PCR Primer of <i>CfATG12</i> |
| qRT <i>CfATG13</i> F | AAAACGATACCCACCAACG    | qRT-PCR Primer of <i>CfATG13</i> |
| qRT <i>CfATG13</i> R | ATACAGCGGATGCCGAAGC    | qRT-PCR Primer of <i>CfATG13</i> |
| qRT <i>CfATG15</i> F | GGGATGTTTGGACGAGACG    | qRT-PCR Primer of <i>CfATG15</i> |
| qRT <i>CfATG15</i> R | GAGGTGATGAGATGCGAAGTG  | qRT-PCR Primer of <i>CfATG15</i> |
| qRT <i>CfATG16</i> F | AACTCTCCGACCGCATCGC    | qRT-PCR Primer of <i>CfATG16</i> |
| qRT <i>CfATG16</i> R | ATCTGCTTCGTGTTCTCCCTGT | qRT-PCR Primer of <i>CfATG16</i> |
| qRT <i>CfATG18</i> F | ACAGTGACGGAAATGTGGGA   | qRT-PCR Primer of <i>CfATG18</i> |
| qRT <i>CfATG18</i> R | AACCGAGAGCTGCTTGACC    | qRT-PCR Primer of <i>CfATG18</i> |
| qRT <i>ACTIN</i> F   | ATCAACCCCAAGTCCAACAG   | qRT-PCR Primer of <i>ACTIN</i>   |
| qRT <i>ACTIN</i> R   | CGATTTACGCTCGGCAGT     | qRT-PCR Primer of <i>ACTIN</i>   |

---
